# Supplementary material for: Combining Prognostic Nutritional Index and Brain Natriuretic Peptide as a Predicting Tool for Heart Transplantation
Source: MDPI journal article supplement (doi:10.3390/jcdd9020040), 2022-01-24
Supplement: s1 [file s1]

## Supplementary Materials:

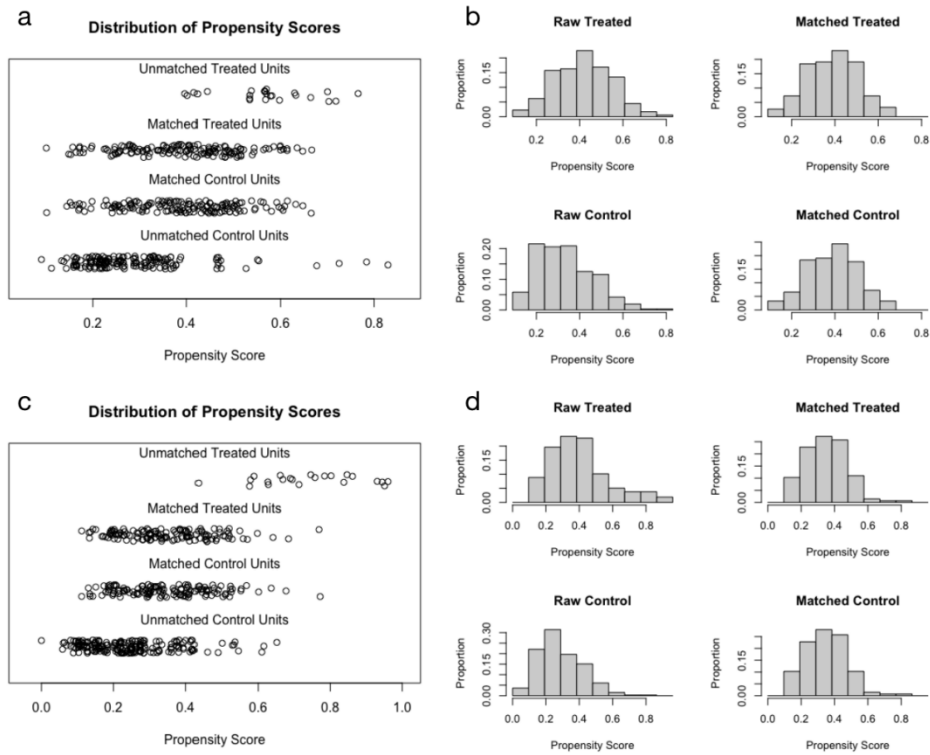

**Figure S1** PSM distribution for PNI and BNP. The density of propensity scores was plotted as scatter diagram (a, c) and histogram (b, d) for each study arm before and after matching. Those matched showed a balanced and heterogeneous distribution in their likelihood of belonging to either study arm.

Table S1 Diagnostic Evaluation of PNI and BNP in peri-transplant period survival

| Evaluation index | PNI                | BNP                | Combined           |
|------------------|--------------------|--------------------|--------------------|
| Sensitivity (%)  | 79.5               | 72                 | 89.7               |
| Specificity (%)  | 41.0               | 46.2               | 65.8               |
| AUC              | 0.603              | 0.591              | 0.620              |
| C-index          | 0.623(0.576-0.666) | 0.597(0.538-0.656) | 0.667(0.611-0.723) |

Table S2 Diagnostic Evaluation of PNI and BNP in 1-year survival

| Evaluation index | PNI                | BNP                | Combined           |
|------------------|--------------------|--------------------|--------------------|
| Sensitivity (%)  | 75.6               | 71.7               | 87.8               |
| Specificity (%)  | 41.4               | 59.0               | 62.3               |
| AUC              | 0.581              | 0.554              | 0.610              |
| C-index          | 0.638(0.584-0.692) | 0.563(0.479-0.647) | 0.666(0.591-0.741) |

Table S3 Diagnostic Evaluation of PNI and BNP in 5-year survival

| Evaluation index | PNI                | BNP                | Combined           |
|------------------|--------------------|--------------------|--------------------|
| Sensitivity (%)  | 79.6               | 71.7               | 85.8               |
| Specificity (%)  | 35.7               | 46.9               | 29.4               |
| AUC              | 0.532              | 0.501              | 0.618              |
| C-index          | 0.546(0.425-0.667) | 0.492(0.384-0.601) | 0.538(0.423-0.652) |
